# Supplementary material for: The World Mental Health International College Student Survey in Canada: Protocol for a Mental Health and Substance Use Trend Study
Source: PubMed Central journal article supplement (PMC9377443; doi:10.2196/35168), 2022-07-29
Supplement: resprot_v11i7e35168_app1.pdf [file resprot_v11i7e35168_app1.pdf]

**Multimedia Appendix 1. English survey instrument.**

**DSM-5 World Mental Health**

**University Student Survey**

**Baseline**

**SHORT FORM**

**VERSION 2**

September 24, 2019

Ronald C. Kessler, Ph.D.  
McNeil Family Professor of Health Care Policy  
Harvard Medical School

Revised and adapted for Canadian students by Daniel Vigo

July 16, 2021

---

Comments to: RC Kessler, Department of Health Care Policy, Harvard Medical School, 180 Longwood Avenue, Boston, MA, USA 02115; [kessler@hcp.med.harvard.edu](mailto:kessler@hcp.med.harvard.edu); 617-432-3587 (Voice); 617-432-3588 (Fax)

**SECTION ORDER:**

SECTION A: YOUR BACKGROUND  
SECTION B: YOUR HEALTH  
SECTION D: ATTENTION AND CONCENTRATION  
SECTION E: EMOTIONAL PROBLEMS  
SECTION F: ALCOHOL AND DRUGS  
SECTION G: SELF-HARM  
SECTION H: SEEKING TREATMENT  
SECTION I: CHILDHOOD BACKGROUND  
SECTION J: RECENT EXPERIENCES  
SECTION K: SEXUALITY

Note: **Please DO NOT hit your internet browser's back arrow as you will be ejected from the survey.** You can use the blue "Back" button within the survey if available. If it is not present, you are unable to go back to the previous question.

## SECTION A: YOUR BACKGROUND

### A1. How old are you?

[DROPDOWN LIST] 16 or younger, 17, ... , 35, 36 or older

### A2. What was your sex at birth?

- Male
- Female

### A2a. What is your current gender?

- Male
  - Female
  - Non-binary
  - Two-spirit
  - Other (*Briefly describe in the text box below*)
- 

### A3. What is your current student status?

- Undergraduate degree, 1<sup>st</sup> year
  - Undergraduate degree, 2<sup>nd</sup> year
  - Undergraduate degree, 3<sup>rd</sup> year
  - Undergraduate degree, 4<sup>th</sup> year
  - Undergraduate degree, 5<sup>th</sup> year
  - Graduate degree student
  - Non-degree student
  - Recently graduated
  - Other (*Briefly describe in the text box below*)
- 

### A3a. What is the status of the courses you are currently taking?

- Entirely online
  - A combination of online and in-person
  - Entirely in-person
  - I'm not taking courses right now
  - Other (*Briefly describe in the text box below*)
- 

### A4. What is your race, ethnicity, or heritage? (*Check all that apply.*)

- White
- Hispanic or Latino
- Black
- First Nations, Métis, or Inuit

- South Asian (e.g., East Indian, Pakistani, Sri Lankan, etc.)
  - Southeast Asian (e.g., Vietnamese, Cambodian, Laotian, Thai, etc.)
  - West Asian (e.g., Afghan, Iranian, etc.)
  - Chinese
  - Filipino
  - Arab
  - Korean
  - Japanese
  - Other (*Please briefly describe*)
- 

**A5. What is your primary language?** (*Check all that apply.*)

- English
  - French
  - Other language (*Please briefly describe*)
- 

**A6. Were you born in Canada?**

- Yes → GO TO A8
- No

[PROGRAMMER: SKIP MISSING WITH "YES"]

**A7. How old were you when you first moved to Canada?** (*Give your best estimate if you cannot remember your exact age. If less than one year old, select "4 or younger."*)

[PROGRAMMER NOTE: IF R SELECTS NUMBER GREATER THAN CURRENT AGE, OR IF BA1 = MISSING, ADD POP UP BOX "PLEASE SELECT A NUMBER NO GREATER THAN YOUR CURRENT AGE."]

[DROPDOWN LIST] 4 or younger, 5, ..., 35, 36 or older

**A8. How many of your parents were born in Canada?**

- Both
- One
- Neither

**A8a. Are you currently living in Canada?**

- Yes
- No

**A9. What's your current housing situation?**

- With parents or other relatives
- In your own home or apartment (owned or rented)
- In a university owned or operated residence
- In a fraternity or sorority house

- In a shared house, apartment, or flat
  - Other (*Please briefly describe*)
- 

**CKPT.A10a.**

1. A8a = "YES" OR MISSING, GO TO A10a.
2. A8a = "NO", GO TO A10b.

**A10a. Please provide the postal code of the area where you are currently living.**

---

**GO TO B1**

**A10b. Please choose the region that best describes where you are currently living:**

[DROPDOWN LIST] North America, Central America and the Caribbean, South America, Western Europe, Central Europe, Eastern Europe, Central Asia, East Asia and Pacific region, South Asia, Sub-Saharan Africa, North Africa

**END OF SECTION**

## SECTION B: YOUR HEALTH

The following section is about your health. It includes questions about COVID-19 with the goals of understanding its impact on the well-being of our community, and improving the health system's response. All answers are anonymous and cannot be traced back to respondents. If these questions are stressful or you prefer not to answer, you may skip them. At the end of the survey you will find mental health resources available to you in the context of COVID-19.

**B1. How would you rate your overall physical health?**

- Excellent
- Very good
- Good
- Fair
- Poor

**B2. How would you rate your overall mental health?**

- Excellent
- Very good
- Good
- Fair
- Poor

**B3. During the past 12 months, how much did each of the following kinds of problems interfere with your performance at school?**

|                                                                    | Very severe interference | Severe                | Moderate              | Mild                  | No interference       |
|--------------------------------------------------------------------|--------------------------|-----------------------|-----------------------|-----------------------|-----------------------|
| a. Physical health problems                                        | <input type="radio"/>    | <input type="radio"/> | <input type="radio"/> | <input type="radio"/> | <input type="radio"/> |
| b. Mental or emotional health problems (e.g., anxiety, depression) | <input type="radio"/>    | <input type="radio"/> | <input type="radio"/> | <input type="radio"/> | <input type="radio"/> |
| c. Alcohol or drug use problems                                    | <input type="radio"/>    | <input type="radio"/> | <input type="radio"/> | <input type="radio"/> | <input type="radio"/> |

**B4. During the past 12 months, how much did each of the following kinds of problems interfere with your personal or social life?**

|                                                                    | Very severe interference | Severe                | Moderate              | Mild                  | No interference       |
|--------------------------------------------------------------------|--------------------------|-----------------------|-----------------------|-----------------------|-----------------------|
| a. Physical health problems                                        | <input type="radio"/>    | <input type="radio"/> | <input type="radio"/> | <input type="radio"/> | <input type="radio"/> |
| b. Mental or emotional health problems (e.g., anxiety, depression) | <input type="radio"/>    | <input type="radio"/> | <input type="radio"/> | <input type="radio"/> | <input type="radio"/> |
| c. Alcohol or drug use problems                                    | <input type="radio"/>    | <input type="radio"/> | <input type="radio"/> | <input type="radio"/> | <input type="radio"/> |

**B5. Have you ever in your life had any of the following emotional problems?**

|                                                 | Yes                   | No                    |
|-------------------------------------------------|-----------------------|-----------------------|
| a. Depression                                   | <input type="radio"/> | <input type="radio"/> |
| b. Manic-depression, mania, or bipolar disorder | <input type="radio"/> | <input type="radio"/> |

|                                                                            |                       |                       |
|----------------------------------------------------------------------------|-----------------------|-----------------------|
| c. Panic attacks                                                           | <input type="radio"/> | <input type="radio"/> |
| d. Problems with anxiety (nerves, worries, fears, compulsions, obsessions) | <input type="radio"/> | <input type="radio"/> |
| e. Any other serious emotional problem                                     | <input type="radio"/> | <input type="radio"/> |

**B6. In the past 30 days, how often did you have each of the following?**

|                                                                       | All or almost all of the time | Most of the time      | Some of the time      | A little of the time  | None of the time      |
|-----------------------------------------------------------------------|-------------------------------|-----------------------|-----------------------|-----------------------|-----------------------|
| a. Pain in your back, neck, arms, legs, or joints (knees, hips, etc.) | <input type="radio"/>         | <input type="radio"/> | <input type="radio"/> | <input type="radio"/> | <input type="radio"/> |
| b. Headaches                                                          | <input type="radio"/>         | <input type="radio"/> | <input type="radio"/> | <input type="radio"/> | <input type="radio"/> |
| c. Pain in any other part of the body                                 | <input type="radio"/>         | <input type="radio"/> | <input type="radio"/> | <input type="radio"/> | <input type="radio"/> |
| d. Muscle tension                                                     | <input type="radio"/>         | <input type="radio"/> | <input type="radio"/> | <input type="radio"/> | <input type="radio"/> |
| e. Dizziness                                                          | <input type="radio"/>         | <input type="radio"/> | <input type="radio"/> | <input type="radio"/> | <input type="radio"/> |

**B7. Health Canada indicates the following are common symptoms of COVID-19: cough, difficulty breathing, fever, chills, fatigue, body aches, headaches, loss of smell or taste, and gastrointestinal symptoms. Have you had any of these symptoms since January, 2020?**

- Yes, and I tested positive for COVID-19 (or was diagnosed with COVID-19 by a health provider)
- Yes, and I tested negative for COVID-19
- Yes, but I didn't or couldn't get tested for COVID-19
- No

**CKPT.B7a.**

1. B7 = "NO," GO TO B8
2. ALL OTHERS GO TO B7a

**B7a. Have you (B7= "YES, AND I TESTED POSITIVE FOR COVID-19 (OR WAS DIAGNOSED WITH COVID-19 BY A HEALTH PROVIDER)": tested positive or been diagnosed/B7= "YES, AND I TESTED NEGATIVE FOR COVID-19": tested negative/ALL OTHERS: had these symptoms) in the past two weeks?**

- Yes
- No

**CKPT.B7b.**

1. B7 = "YES, BUT I DIDN'T OR COULDN'T GET TESTED FOR COVID-19," GO TO B7b
2. ALL OTHERS GO TO B7c

**B7b. Do you think you definitely had COVID-19, probably had it, possibly, probably did not have it, or definitely did not have it?**

- Definitely had it
- Probably had it
- Possibly
- Probably did not
- Definitely did not

**B7c. How were your symptoms treated?**

- Hospitalized and intubated (i.e., put on a ventilator)
- Hospitalized but not intubated (i.e., not put on a ventilator)
- Quarantined or isolated at home under orders of a health care professional
- Given instructions on self-treatment and told to avoid public places but not told to quarantine or isolate
- Not treated

**B8. Do you know anyone who you think tested positive for COVID-19 or was diagnosed with COVID-19 by a health provider?** *(If you know people in more than one place, choose the option closest to where you are currently living.)*

- Yes, I know someone in the city I am living in
- Yes, I know someone in the country I am living in, but not the city
- Yes, I know someone but not in the country I am living in
- No

**CKPT.B9.**

1. B8 = "NO," GO TO B11
2. ALL OTHERS GO TO B9

**B9. How many people of each type were infected with COVID-19?**

|                                                                                                               | <b>Number of people</b> |
|---------------------------------------------------------------------------------------------------------------|-------------------------|
| a. Someone living with you at the time                                                                        |                         |
| b. Any close loved one not living with you at the time (e.g., parent, child, sibling, partner other relative) |                         |
| c. Someone working with you                                                                                   |                         |
| d. Someone taking a course with you                                                                           |                         |
| e. Close friend not living, working, or doing coursework with you at the time                                 |                         |
| f. Anyone else you know (e.g., neighbor, acquaintance)                                                        |                         |

**B10a. Have they been diagnosed with COVID-19 in the past two weeks?** *(If you know more than one person who has been positive for COVID-19 in the past two weeks think about the individual with the most severe symptoms.)*

- Yes, and they have been hospitalized for severe symptoms
- Yes, and they have/had mild-moderate symptoms
- Yes, and they were asymptomatic
- No

**CKPT.B10b.**



1. B9a = 1 OR MORE OR B9b = 1 OR MORE OR B9c = 1 OR MORE OR B9d = 1 OR MORE OR B9e = 1 OR MORE OR B9f = 1 OR MORE, GO TO B10b
2. ALL OTHERS GO TO B11

**B10b. (B9a + B9b + B9c + B9d + B9e + B9f = 1: Did this person die from COVID-19?/B9a + B9b + B9c + B9d + B9e + B9f = 2: Did either of these people die from COVID-19?/ALL OTHERS: Did any of these people die from COVID-19?)**

- Yes
- No

**CKPT.B10c.**

1. B10b = "YES," GO TO B10c
2. ALL OTHERS GO TO B11

**B10c. Who died from COVID-19? (Check all that apply.)**

- One of your parents
- Your significant other, partner, or spouse
- Any other close relative
- A close friend
- Someone you work with
- Anyone else you know (e.g., neighbor, acquaintance)

**B11. Does anyone (B9a > "0" : else) in your residence/house/apartment have symptoms such as a cough, difficulty breathing, fever, chills, fatigue, body aches, headaches, loss of smell or taste, or gastrointestinal symptoms?**

- Yes, but they tested negative for COVID-19
- Yes, but they did not get tested or I am not aware of whether they got tested
- Not that I know of

**CKPT.B12.**

1. A3a = "ENTIRELY IN-PERSON" OR "A COMBINATION OF ONLINE AND IN-PERSON", GO TO B12
2. ALL OTHERS GO TO B13

**B12. Does anyone (B9d > "0": else) in your courses have symptoms such as a cough, difficulty breathing, fever, chills, fatigue, body aches, headaches, loss of smell or taste, or gastrointestinal symptoms?**

- Yes, but they tested negative for COVID-19
- Yes, and I am not aware of whether they got tested
- Not that I know of

**B13. Has the COVID-19 pandemic affected your emotional wellbeing?**

- No
- Yes, but I was able to manage it
- Yes, I was/am overwhelmed and couldn't/can't find help
- Yes, I was/am overwhelmed but I was/am able to get help



|                                                                                                    | Very often            | Often                 | Sometimes             | Rarely                | Never                 |
|----------------------------------------------------------------------------------------------------|-----------------------|-----------------------|-----------------------|-----------------------|-----------------------|
| a. You avoided or delayed getting started when you had a task that required a lot of thought       | <input type="radio"/> | <input type="radio"/> | <input type="radio"/> | <input type="radio"/> | <input type="radio"/> |
| b. You had problems remembering appointments or obligations                                        | <input type="radio"/> | <input type="radio"/> | <input type="radio"/> | <input type="radio"/> | <input type="radio"/> |
| c. You had difficulty getting things in order when you had to do a task that required organization | <input type="radio"/> | <input type="radio"/> | <input type="radio"/> | <input type="radio"/> | <input type="radio"/> |
| d. You had trouble wrapping up the final details of a project once the challenging parts were done | <input type="radio"/> | <input type="radio"/> | <input type="radio"/> | <input type="radio"/> | <input type="radio"/> |
| e. You felt overly active and compelled to do things, like you were driven by a motor              | <input type="radio"/> | <input type="radio"/> | <input type="radio"/> | <input type="radio"/> | <input type="radio"/> |
| f. You fidgeted or squirmed with your hands or feet when you had to sit down for a long time       | <input type="radio"/> | <input type="radio"/> | <input type="radio"/> | <input type="radio"/> | <input type="radio"/> |

**CKPT.D2.**

1. THREE OR MORE RESPONSES IN D1a-f SERIES = AT LEAST "SOMETIMES," GO TO D2
2. ALL OTHERS GO TO NEXT SECTION

**D2. About how old were you the very first time you had problems with organization, concentration, or impulsivity?**

[DROPDOWN LIST] 4 or younger, 5, ..., 35, 36 or older

**END OF SECTION**

## SECTION E: EMOTIONAL PROBLEMS

**E1. The next questions are about emotional difficulties you might have experienced at some time in your life.**

**(B5a = "YES": Earlier in the survey you reported having a history of depression. Think about the times lasting 2 weeks or longer when you had the strongest feelings of this sort. During those times, how often did you have each of the following experiences?/ALL OTHERS: Virtually everyone has times in their life when they feel sad, depressed, or discouraged about how things are going in their life. Think about the times lasting 2 weeks or longer when you had the strongest feelings of this sort. During those times, how often did you have each of the following experiences? (If you are one of the few people that never had such times, mark "none of the time" to all the following questions.))**

|                                                               | All or<br>almost all<br>the time | Most of<br>the time   | Some of<br>the time   | A little of<br>the time | None of<br>the time   |
|---------------------------------------------------------------|----------------------------------|-----------------------|-----------------------|-------------------------|-----------------------|
| a. Feel sad or depressed?                                     | <input type="radio"/>            | <input type="radio"/> | <input type="radio"/> | <input type="radio"/>   | <input type="radio"/> |
| b. Feel discouraged about how things were going in your life? | <input type="radio"/>            | <input type="radio"/> | <input type="radio"/> | <input type="radio"/>   | <input type="radio"/> |
| c. Take little or no interest or pleasure in things?          | <input type="radio"/>            | <input type="radio"/> | <input type="radio"/> | <input type="radio"/>   | <input type="radio"/> |
| d. Feel down on yourself, no good, or worthless?              | <input type="radio"/>            | <input type="radio"/> | <input type="radio"/> | <input type="radio"/>   | <input type="radio"/> |

**CKPT.E2.**

1. (E1a OR E1b = AT LEAST "MOST OF THE TIME") OR (E1c = AT LEAST "MOST OF THE TIME"), GO TO E2
2. E1a = "NONE OF THE TIME" AND E1b = "NONE OF THE TIME" AND E1c = "NONE OF THE TIME" AND E1d = "NONE OF THE TIME," GO TO E7
3. ALL OTHERS GO TO E6

**E2. During those times, how often did you have each of the following experiences?**

|                                                                                                                                 | All or<br>almost all<br>the time | Most of<br>the time   | Some of<br>the time   | A little of<br>the time | None of<br>the time   |
|---------------------------------------------------------------------------------------------------------------------------------|----------------------------------|-----------------------|-----------------------|-------------------------|-----------------------|
| a. Think a lot about death (either your own, someone else's, or death in general)?                                              | <input type="radio"/>            | <input type="radio"/> | <input type="radio"/> | <input type="radio"/>   | <input type="radio"/> |
| b. Have trouble concentrating or making day-to-day decisions?                                                                   | <input type="radio"/>            | <input type="radio"/> | <input type="radio"/> | <input type="radio"/>   | <input type="radio"/> |
| c. Have a poor appetite or overeat?                                                                                             | <input type="radio"/>            | <input type="radio"/> | <input type="radio"/> | <input type="radio"/>   | <input type="radio"/> |
| d. Have problems falling asleep, staying asleep, waking up too early, or sleeping too much?                                     | <input type="radio"/>            | <input type="radio"/> | <input type="radio"/> | <input type="radio"/>   | <input type="radio"/> |
| e. Talk or move more slowly than usual?                                                                                         | <input type="radio"/>            | <input type="radio"/> | <input type="radio"/> | <input type="radio"/>   | <input type="radio"/> |
| f. Feel tired out, low in energy, or easily fatigued?                                                                           | <input type="radio"/>            | <input type="radio"/> | <input type="radio"/> | <input type="radio"/>   | <input type="radio"/> |
| g. Feel so low that it either caused distress or interfered with your activities at home, work, school, or in your social life? | <input type="radio"/>            | <input type="radio"/> | <input type="radio"/> | <input type="radio"/>   | <input type="radio"/> |

**CKPT.E3.**

1. (FIVE OR MORE RESPONSES IN (E1a OR E1b), E1c, E1d, E2a, E2b, E2c, E2d, E2e, E2f = AT LEAST "SOME OF THE TIME") AND [(E1a OR E1b = AT LEAST "MOST OF THE TIME") OR (E1c = AT LEAST "MOST OF THE TIME")], GO TO E3

2. ALL OTHERS GO TO E6

**E3. About how old were you the very first time you (E1a = AT LEAST "MOST OF THE TIME": felt sad or depressed/E1b = AT LEAST "MOST OF THE TIME": felt discouraged/ALL OTHERS: took little interest or pleasure in things) and had some of the other problems you just mentioned that lasted at least 2 weeks?**

[DROPDOWN LIST] 4 or younger, 5, ..., 35, 36 or older

**E4. About how many different years in your life did you have problems like these that lasted at least 2 weeks?**

[DROPDOWN LIST] 1, 2, ..., 35, 36 or more

**E5. About how many months in the past 12 did you have problems like these?**

[DROPDOWN LIST] 0, 1, ..., 11, 12

**E6. In the past 30 days, how often did you have each of the following experiences?**

|                                                               | All or almost all the time | Most of the time      | Some of the time      | A little of the time  | None of the time      |
|---------------------------------------------------------------|----------------------------|-----------------------|-----------------------|-----------------------|-----------------------|
| a. Feel sad or depressed?                                     | <input type="radio"/>      | <input type="radio"/> | <input type="radio"/> | <input type="radio"/> | <input type="radio"/> |
| b. Feel discouraged about how things were going in your life? | <input type="radio"/>      | <input type="radio"/> | <input type="radio"/> | <input type="radio"/> | <input type="radio"/> |
| c. Take little or no interest or pleasure in things?          | <input type="radio"/>      | <input type="radio"/> | <input type="radio"/> | <input type="radio"/> | <input type="radio"/> |
| d. Feel down on yourself, no good, or worthless?              | <input type="radio"/>      | <input type="radio"/> | <input type="radio"/> | <input type="radio"/> | <input type="radio"/> |

**E7. (B5d = "YES": Earlier in the survey you reported having a history of anxiety. Think about the times lasting 1 month or longer in your life when you had the strongest feelings of this sort. During those times, how often did you have each of the following experiences?/ALL OTHERS: Virtually everyone has times in their life when they feel worried or anxious. Think about the times lasting 1 month or longer in your life when you had the strongest feelings of this sort. During those times, how often did you have each of the following experiences? (If you are one of the few people that never had such times, mark "none of the time" to all the following questions.))**

|                                                                                                           | All or almost all the time | Most of the time      | Some of the time      | A little of the time  | None of the time      |
|-----------------------------------------------------------------------------------------------------------|----------------------------|-----------------------|-----------------------|-----------------------|-----------------------|
| a. Feel worried or anxious?                                                                               | <input type="radio"/>      | <input type="radio"/> | <input type="radio"/> | <input type="radio"/> | <input type="radio"/> |
| b. Worry about a number of different things in your life, such as your work, family, health, or finances? | <input type="radio"/>      | <input type="radio"/> | <input type="radio"/> | <input type="radio"/> | <input type="radio"/> |
| c. Feel more worried than other people in your same situation?                                            | <input type="radio"/>      | <input type="radio"/> | <input type="radio"/> | <input type="radio"/> | <input type="radio"/> |
| d. Worry excessively or too much?                                                                         | <input type="radio"/>      | <input type="radio"/> | <input type="radio"/> | <input type="radio"/> | <input type="radio"/> |

**CKPT.E8.**

1. E7a = AT LEAST "MOST OF THE TIME" AND E7b = AT LEAST "MOST OF THE TIME," GO TO E8
2. E7a = "NONE OF THE TIME" AND E7b = "NONE OF THE TIME" AND E7c = "NONE OF THE TIME" AND E7d = "NONE OF THE TIME," GO TO E14

3. ALL OTHERS GO TO E13

**E8. During those times, how often did you have each of the following experiences?**

|                                                                                                                                   | All or almost all the time | Most of the time      | Some of the time      | A little of the time  | None of the time      |
|-----------------------------------------------------------------------------------------------------------------------------------|----------------------------|-----------------------|-----------------------|-----------------------|-----------------------|
| a. Have trouble controlling your worry?                                                                                           | <input type="radio"/>      | <input type="radio"/> | <input type="radio"/> | <input type="radio"/> | <input type="radio"/> |
| b. Feel restless, keyed up, or on edge?                                                                                           | <input type="radio"/>      | <input type="radio"/> | <input type="radio"/> | <input type="radio"/> | <input type="radio"/> |
| c. Feel tired out, low in energy, or easily fatigued?                                                                             | <input type="radio"/>      | <input type="radio"/> | <input type="radio"/> | <input type="radio"/> | <input type="radio"/> |
| d. Have difficulty concentrating or your mind going blank?                                                                        | <input type="radio"/>      | <input type="radio"/> | <input type="radio"/> | <input type="radio"/> | <input type="radio"/> |
| e. Feel irritated, annoyed, or grouchy?                                                                                           | <input type="radio"/>      | <input type="radio"/> | <input type="radio"/> | <input type="radio"/> | <input type="radio"/> |
| f. Have muscle aches or tension?                                                                                                  | <input type="radio"/>      | <input type="radio"/> | <input type="radio"/> | <input type="radio"/> | <input type="radio"/> |
| g. Have difficulty falling or staying asleep or have restless, unsatisfying sleep?                                                | <input type="radio"/>      | <input type="radio"/> | <input type="radio"/> | <input type="radio"/> | <input type="radio"/> |
| h. Feel so upset that it either caused distress or interfered with your activities at home, work, school, or in your social life? | <input type="radio"/>      | <input type="radio"/> | <input type="radio"/> | <input type="radio"/> | <input type="radio"/> |

**CKPT.E9.**

1. (E7a = AT LEAST "MOST OF THE TIME") AND (E7b = AT LEAST "MOST OF THE TIME") AND (THREE OR MORE RESPONSES IN E8b, E8c, E8d, E8e, E8f, E8g = AT LEAST "SOME OF THE TIME"), GO TO E9
2. ALL OTHERS GO TO E13

**E9. How long during those times did your worry and anxiety usually last?**

- Less than 1 month
- 1-2 months
- 3-5 months
- 6-7 months
- 8-12 months

**E10. About how old were you the very first time you felt worried, anxious, and had some of the other problems you just mentioned that lasted at least 1 month?**

[DROPDOWN LIST] 4 or younger, 5, ..., 35, 36 or older

**E11. About how many different years in your life did you have problems like these that lasted at least 1 month?**

[DROPDOWN LIST] 1, 2, ..., 35, 36 or more

**E12. About how many months in the past 12 did you have problems like these?**

[DROPDOWN LIST] 0, 1, ..., 11, 12

**E13. In the past 30 days, how often did you have each of the following experiences?**

|                                                                                                           | All or almost all the time | Most of the time      | Some of the time      | A little of the time  | None of the time      |
|-----------------------------------------------------------------------------------------------------------|----------------------------|-----------------------|-----------------------|-----------------------|-----------------------|
| a. Feel worried or anxious?                                                                               | <input type="radio"/>      | <input type="radio"/> | <input type="radio"/> | <input type="radio"/> | <input type="radio"/> |
| b. Worry about a number of different things in your life, such as your work, family, health, or finances? | <input type="radio"/>      | <input type="radio"/> | <input type="radio"/> | <input type="radio"/> | <input type="radio"/> |
| c. Feel more worried than other people in your same situation?                                            | <input type="radio"/>      | <input type="radio"/> | <input type="radio"/> | <input type="radio"/> | <input type="radio"/> |
| d. Worry excessively or too much?                                                                         | <input type="radio"/>      | <input type="radio"/> | <input type="radio"/> | <input type="radio"/> | <input type="radio"/> |

**E14. (B5c = "YES": Earlier in the survey you reported having a history of panic attacks. About how many panic attacks did you ever have in your life?/ALL OTHERS: The next question is about panic attacks, also sometimes called anxiety attacks. These are sudden, strong feelings of fear or anxiety that reach their peak within a few minutes and are usually accompanied by physical reactions like racing heart, sweating, shortness of breath, feeling faint, or feeling sick to your stomach. People who have panic attacks sometimes feel like they might lose control, go crazy, or suddenly die. With this definition in mind, about how many panic attacks did you ever have in your life?) (You can use any number between 0 and 999 to answer.)**

\_\_\_\_\_ NUMBER OF PANIC ATTACKS

**CKPT.E15.**

1.  $E14 \geq 1$  AND  $\neq$  MISSING, GO TO E15
2. ALL OTHERS GO TO CKPT.E23

**E15. Which of the following problems do you usually have during these attacks? (Check all that apply.)**

- A pounding or racing heart
- Sweating
- Trembling or shaking
- Shortness of breath
- Feeling like you might throw up
- Chest pain or discomfort
- Feelings of choking
- Feeling dizzy, light-headed, or faint
- Chills or heat sensations
- Numbness or tingling
- Fear of losing control or going crazy
- Fear of dying
- Feeling like things around you were unreal or like a dream
- Feeling like you were "not really there," like you were watching a movie of yourself

**CKPT.E16.**

3. ( $E14 = 1$  OR 2) AND (FOUR OR MORE RESPONSES CHECKED IN E15), GO TO E22
4. FOUR OR MORE RESPONSES CHECKED IN E15, GO TO E16
5. ALL OTHERS GO TO CKPT.E23

**E16. Attacks like these sometimes happen without provocation ("out of the blue") and other times occur in situations where a person has a strong fear (e.g., a fear of heights or of snakes) or is in real danger (e.g., a motor vehicle accident). When did your attacks occur?**

- All of your attacks occurred without provocation ("out of the blue")

- Some of your attacks occurred "out of the blue" and others in situations where you had a strong fear or were in real danger
- All of your attacks occurred in situations where you had a strong fear or were in real danger

**CKPT.E17.**

1. E16 = "ALL OF YOUR ATTACKS OCCURRED WITHOUT PROVOCATION," GO TO E18
2. E16 = "SOME OF YOUR ATTACKS OCCURRED 'OUT OF THE BLUE' AND OTHERS IN SITUATIONS WHERE YOU HAD A STRONG FEAR OR WERE IN REAL DANGER," GO TO E17
3. E16 = "ALL OF YOUR ATTACKS OCCURRED IN SITUATIONS WHERE YOU HAD A STRONG FEAR OR WERE IN REAL DANGER," GO TO E22
4. ALL OTHERS GO TO CKPT.E23

**E17. About how many "out of the blue" attacks did you ever have in your life?** (You can use any number between 1 and 999 to answer.)

\_\_\_\_\_ NUMBER OF ATTACKS

**CKPT.E18.**

1. E16 = "SOME OF YOUR ATTACKS OCCURRED 'OUT OF THE BLUE' AND OTHERS IN SITUATIONS WHERE YOU HAD A STRONG FEAR OR WERE IN REAL DANGER" AND E17 = 0-2, GO TO E22
2. ALL OTHERS GO TO E18

**E18. (E16 = "SOME OF YOUR ATTACKS OCCURRED "OUT OF THE BLUE" AND OTHERS IN SITUATIONS WHERE YOU HAD A STRONG FEAR OR WERE IN REAL DANGER": During the time when these "out of the blue" attacks were most severe or frequent, how often did you.../ALL OTHERS: During the time when these attacks were most severe or frequent, how often did you...)**

|                                                                                                                                                                | All or almost all the time | Most of the time      | Some of the time      | A little of the time  | None of the time      |
|----------------------------------------------------------------------------------------------------------------------------------------------------------------|----------------------------|-----------------------|-----------------------|-----------------------|-----------------------|
| a. worry about having another attack?                                                                                                                          | <input type="radio"/>      | <input type="radio"/> | <input type="radio"/> | <input type="radio"/> | <input type="radio"/> |
| b. avoid going certain places or doing certain things because you might have another attack or change your everyday activities to avoid having another attack? | <input type="radio"/>      | <input type="radio"/> | <input type="radio"/> | <input type="radio"/> | <input type="radio"/> |

**CKPT.E19.**

1. E18a OR E18b = AT LEAST "A LITTLE OF THE TIME," GO TO E19
2. ALL OTHERS GO TO E22

**E19. (E16 = "SOME OF YOUR ATTACKS OCCURRED "OUT OF THE BLUE" AND OTHERS IN SITUATIONS WHERE YOU HAD A STRONG FEAR OR WERE IN REAL DANGER": During the time when these "out of the blue" attacks were most severe or frequent, how long did you worry about having another attack or change your behaviour because of these attacks?/ALL OTHERS: During the time when these attacks were most severe or frequent, how long did you worry about having another attack or change your behaviour because of these attacks?)**

- Less than 1 month
- 1-2 months
- 3-5 months
- 6-7 months
- 8-12 months



**E20. (E16 = "SOME OF YOUR ATTACKS OCCURRED "OUT OF THE BLUE" AND OTHERS IN SITUATIONS WHERE YOU HAD A STRONG FEAR OR WERE IN REAL DANGER": About how old were you the very first time you had an "out of the blue" panic attack?/ALL OTHERS: About how old were you the very first time you had a panic attack?)**

[DROPDOWN LIST] 4 or younger, 5, ..., 35, 36 or older

**E21. (E16 = "SOME OF YOUR ATTACKS OCCURRED "OUT OF THE BLUE" AND OTHERS IN SITUATIONS WHERE YOU HAD A STRONG FEAR OR WERE IN REAL DANGER": About how many different years in your life did you have at least one of these "out of the blue" attacks?/ALL OTHERS: About how many different years in your life did you have at least one of these attacks?)**

[DROPDOWN LIST] 1, 2, ..., 35, 36 or more

*NOTE: In the original World Mental Health College Student Survey, Question E22 asked: "About how many days out of 365 in the past year did you have one or more of these attacks?" This question was edited in the current version of the survey to instead ask about the number of months in the past year. These need to be converted to the same metric when doing analysis.*

**E22. (E16 = "SOME OF YOUR ATTACKS OCCURRED "OUT OF THE BLUE" AND OTHERS IN SITUATIONS WHERE YOU HAD A STRONG FEAR OR WERE IN REAL DANGER": About how many months in the past 12 did you have one or more "out of the blue" panic attacks?/ALL OTHERS: About how many months in the past 12 did you have one or more panic attacks?)**

[DROPDOWN LIST] 0, 1, ..., 11, 12

**CKPT.E22a.**

1. E22 = 1-12, GO TO E22a
2. ALL OTHERS GO TO CKPT.E23

**E22a. (E16 = "SOME OF YOUR ATTACKS OCCURRED "OUT OF THE BLUE" AND OTHERS IN SITUATIONS WHERE YOU HAD A STRONG FEAR OR WERE IN REAL DANGER": About how many days in the past 30 did you have one or more "out of the blue" panic attacks?/ALL OTHERS: About how many days in the past 30 did you have one or more panic attacks?)**

[DROPDOWN LIST] 0, 1, ..., 29, 30

**CKPT.E23.**

1. B5b = "YES," GO TO E24
2. ALL OTHERS GO TO E23

**E23. The next question is about whether you ever in your life had an episode lasting several days or longer when your mood was much higher than usual and you were much more excitable or hyper than usual. We don't mean an expected reaction to something that was fun or exciting, but an episode when you were really different from usual in terms of your reactions to things. Please carefully read the following description of these episodes:**

**I. These episodes usually last between several days and several weeks. During these episodes, people feel one or more of the following experiences:**

- Much happier, in a much better mood, or much more excitable than usual
- Much more self-confident or optimistic than usual
- Or much more irritable, grumpy, or quick-tempered than usual

**II. During these episodes, people often are:**

- Much more energetic, active, or hyper than usual
- Much more talkative, open, or outgoing than usual
- Or much more productive or engaged than usual in work, school, or other activities

**III. People sometimes do things that are unusual for them during these episodes, such as one or more of the following:**

- **Spending too much money on things they don't need**
- **Getting into relationships they would not usually get into**
- **Doing other things they would normally be too worried or embarrassed to do**

**With this definition in mind, do you think you ever in your life had an episode of this sort?**

- Yes  
 No

**CKPT.E24.**

1. E23 = "YES," GO TO E24
2. ALL OTHERS GO TO E34

**E24. (B5b = "YES": Earlier in the survey you reported having a history of manic-depression, mania, or bipolar disorder. Think about a typical intense episode lasting several days or longer when your mood was much higher than usual and you were much more excitable or hyper than usual./ALL OTHERS: Think about a typical intense episode of this sort lasting several days or longer.) How much of the time during that episode...**

|                                                                                                   | <b>All or almost all the time</b> | <b>Most of the time</b> | <b>Some of the time</b> | <b>A little of the time</b> | <b>None of the time</b> |
|---------------------------------------------------------------------------------------------------|-----------------------------------|-------------------------|-------------------------|-----------------------------|-------------------------|
| a. were you in a much better mood, much happier, or much more excitable than usual?               | <input type="radio"/>             | <input type="radio"/>   | <input type="radio"/>   | <input type="radio"/>       | <input type="radio"/>   |
| b. were you much more irritable or quick to take offense than usual?                              | <input type="radio"/>             | <input type="radio"/>   | <input type="radio"/>   | <input type="radio"/>       | <input type="radio"/>   |
| c. were you a lot more self-confident or optimistic than usual or believed you could do anything? | <input type="radio"/>             | <input type="radio"/>   | <input type="radio"/>   | <input type="radio"/>       | <input type="radio"/>   |

**CKPT.E25.**

1. E24a OR E24b = AT LEAST "SOME OF THE TIME," GO TO E25
2. ALL OTHERS GO TO E34

**E25. How much of the time during that episode were you...**

|                                                                               | <b>All or almost all the time</b> | <b>Most of the time</b> | <b>Some of the time</b> | <b>A little of the time</b> | <b>None of the time</b> |
|-------------------------------------------------------------------------------|-----------------------------------|-------------------------|-------------------------|-----------------------------|-------------------------|
| a. much more active or energetic than usual?                                  | <input type="radio"/>             | <input type="radio"/>   | <input type="radio"/>   | <input type="radio"/>       | <input type="radio"/>   |
| b. much more hyper or wound up than usual?                                    | <input type="radio"/>             | <input type="radio"/>   | <input type="radio"/>   | <input type="radio"/>       | <input type="radio"/>   |
| c. much more engaged, busy, or productive than usual at school or work?       | <input type="radio"/>             | <input type="radio"/>   | <input type="radio"/>   | <input type="radio"/>       | <input type="radio"/>   |
| d. much more sociable or outgoing than usual?                                 | <input type="radio"/>             | <input type="radio"/>   | <input type="radio"/>   | <input type="radio"/>       | <input type="radio"/>   |
| e. much more involved than usual in thinking about or doing something sexual? | <input type="radio"/>             | <input type="radio"/>   | <input type="radio"/>   | <input type="radio"/>       | <input type="radio"/>   |

**E26. How much of the time during that episode...**

|    |                                                                                  | All or almost all the time | Most of the time      | Some of the time      | A little of the time  | None of the time      |
|----|----------------------------------------------------------------------------------|----------------------------|-----------------------|-----------------------|-----------------------|-----------------------|
| a. | did you sleep much less than usual and still did not get tired or sleepy?        | <input type="radio"/>      | <input type="radio"/> | <input type="radio"/> | <input type="radio"/> | <input type="radio"/> |
| b. | did you talk so much that other people couldn't get their say?                   | <input type="radio"/>      | <input type="radio"/> | <input type="radio"/> | <input type="radio"/> | <input type="radio"/> |
| c. | did thoughts race through your mind so fast you could hardly keep track of them? | <input type="radio"/>      | <input type="radio"/> | <input type="radio"/> | <input type="radio"/> | <input type="radio"/> |
| d. | did you have a hard time concentrating on what you were doing?                   | <input type="radio"/>      | <input type="radio"/> | <input type="radio"/> | <input type="radio"/> | <input type="radio"/> |
| e. | did you make bad decisions that could have caused problems for you?              | <input type="radio"/>      | <input type="radio"/> | <input type="radio"/> | <input type="radio"/> | <input type="radio"/> |

**CKPT.E27.**

1. (E24a OR E24b = AT LEAST "SOME OF THE TIME") AND (ONE OR MORE RESPONSES IN E25a-e SERIES = AT LEAST "SOME OF THE TIME") AND (TWO OR MORE RESPONSES IN E24c, (E25a OR E25b OR E25c OR E25d OR E25e), E26a, E26b, E26c, E26d, E26e = AT LEAST "SOME OF THE TIME"), GO TO E27
2. ALL OTHERS GO TO E34

**E27. About how old were you the very first time you had an episode of this sort that lasted several days or longer?**

[DROPDOWN LIST] 4 or younger, 5, ..., 35, 36 or older

**E28. About how many different years in your life did you have an episode of this sort that lasted several days or longer?**

[DROPDOWN LIST] 1, 2, ..., 35, 36 or more

**E29. What was the longest number of days in a row you ever had an episode of this sort?**

\_\_\_\_\_ NUMBER OF DAYS

**E30. How much did episodes of this sort ever interfere with your activities at home, work, school, or in your social life?**

- Extremely
- A lot
- Some
- A little
- Not at all

**E31. How often during episodes of this sort did anyone notice or comment that you were much more energetic, wound up, productive, or outgoing than usual?**

- Often
- Sometimes
- Rarely
- Never

**E32. Were you ever hospitalized for one of these episodes?**

- Yes
- No

*NOTE: In the original World Mental Health College Student Survey, Question E33 asked: "About how many days out of 365 in the past year did you have an episode of this sort?" This question was edited in the current version of the survey to instead ask about the number of months in the past year. These need to be converted to the same metric when doing analysis.*

**E33. About how many months in the past 12 did you have an episode of this sort?**

[DROPDOWN LIST] 0, 1, ..., 11, 12

**CKPT.E33a.**

1. E33 = 1-11, GO TO E33a
2. ALL OTHERS GO TO E34

**E33a. Did you have an episode of this sort at any time in the past 30 days?**

- Yes
- No

**E34. Did you ever in your life have repeated attacks of anger when all of a sudden you lost control and either broke or smashed something, hit or tried to hurt someone, or threatened someone?**

- Yes
- No

**CKPT.E35.**

1. E34 = "YES," GO TO E35
2. ALL OTHERS GO TO E36

**E35. About how many months in the past 12 did you have one or more of these anger attacks?**

[DROPDOWN LIST] 0, 1, ..., 11, 12

**CKPT.E35a.**

1. E35 = 1-11, GO TO E35a
2. ALL OTHERS GO TO E36

**E35a. Did you have one of these attacks at any time in the past 30 days?**

- Yes
- No

**E36. Did you ever in your life have times lasting 1 month or longer after an extremely stressful experience when you had frequent upsetting memories or dreams, felt jumpy, felt emotionally distant or depressed, and had trouble sleeping or concentrating?**

- Yes
- No

**CKPT.E37.**

1. E36 = "YES," GO TO E37
2. ALL OTHERS GO TO E38

**E37. About how many months in the past 12 did you have reactions like these to any extremely stressful experience?**

[DROPDOWN LIST] 0, 1, ..., 11, 12

**CKPT.E37a.**

1. E37 = 1-11, GO TO E37a
2. ALL OTHERS GO TO E38

**E37a. Did you have reactions like these at any time in the past 30 days?**

- Yes  
 No

**E38. Did you ever have a time in your life when you were much more fearful, anxious, or shy than other people about being in social situations (e.g., meeting new people, attending a party, eating in public, talking to people in authority, speaking up in class)?**

- Yes  
 No

**CKPT.E39.**

1. E38 = "YES," GO TO E39
2. ALL OTHERS GO TO E42

**E39. How often do you try to avoid these social situations?**

- All or almost all the time  
 Most of the time  
 Some of the time  
 A little of the time  
 None of the time

**E40. How much does your fear, anxiety, or avoidance of social situations ever interfere with your life?**

- Extremely  
 A lot  
 Some  
 A little  
 Not at all

**E41. About how many months in the past 12 were you much more fearful, anxious, or shy than other people about being in social situations?**

[DROPDOWN LIST] 0, 1, ..., 11, 12

**CKPT.E41a.**

1. E41 = 1-11, GO TO E41a
2. ALL OTHERS GO TO E42

**E41a. Did you have this fear or anxiety at any time in the past 30 days?**

- Yes  
 No

**E42. Did you ever in your life have times lasting 3 months or longer when you had eating binges at least once a week; that is, your eating was out of control and you ate a very large amount of food over a short period of time (2 hours or less)?**

- Yes  
 No

**CKPT.E43.**

1. E42 = "YES," GO TO E43
2. ALL OTHERS GO TO E44

**E43. About how many months in the past 12 did you have eating binges?**

[DROPDOWN LIST] 0, 1, ..., 11, 12

**CKPT.E43a.**

1. E43 = 1-11, GO TO E43a
2. ALL OTHERS GO TO E44

**E43a. Did you have eating binges at any time in the past 30 days?**

- Yes  
 No

**E44. Did you ever in your life have times lasting 3 months or longer when you made yourself vomit or took laxatives or did other things to avoid gaining weight after binge eating?**

- Yes  
 No

**CKPT.E45.**

1. E44 = "YES," GO TO E45
2. ALL OTHERS GO TO E46

**E45. About how many months in the past 12 did you make yourself vomit or take laxatives or do other things to avoid gaining weight after binge eating?**

[DROPDOWN LIST] 0, 1, ..., 11, 12

**CKPT.E45a.**

1. E45 = 1-11, GO TO E45a
2. ALL OTHERS GO TO E46

**E45a. Did you do these things at any time in the past 30 days?**

- Yes
- No

**E46. Did you ever have an unusual experience like seeing things that other people couldn't see or hearing things that other people couldn't hear, not including when you were half-asleep or drinking alcohol or taking drugs?**

- Yes
- No

**E47. Did you ever have strange thoughts like believing your mind was being controlled by outside forces, that someone or something was sending you special signs (like through the TV), or that someone or something was plotting to harm you?**

- Yes
- No

**END OF SECTION**

## SECTION F: ALCOHOL AND DRUGS

**F1. The following questions have to do with drinking alcohol.**

**How often do you have a drink containing alcohol?**

- 4 or more times a week
- 2-3 times a week
- 2-4 times a month
- Monthly or less
- Never

**CKPT.F2.**

1. F1 = "NEVER," GO TO F10.1
2. ALL OTHERS GO TO F2

**F2. How many drinks containing alcohol do you have on a typical day when you are drinking?**

- 10 or more
- 7 to 9
- 5 or 6
- 4
- 3
- 2
- 1
- I never drink alcohol [PROGRAMMER NOTE: RESPONSE OPTION ONLY DISPLAYS IF F1 = MISSING]

**CKPT.F3.**

1. F1 = MISSING AND F2 = MISSING OR "I NEVER DRINK ALCOHOL", GO TO F10.1
2. ALL OTHERS GO TO F2a

**F2a. How many drinks containing alcohol do you have during a typical week?**

- More than 15
- Between 11 and 15
- 10 or less

**F2b. How often do you have (A2 = "MALE": 4 or more/ALL OTHERS: 3 or more) drinks on one occasion?**

- Daily or almost daily
- Weekly
- Monthly
- Less than monthly
- Never

**CKPT.F3.**

1. F2b = "NEVER," GO TO F4
2. ALL OTHERS GO TO F3

**F3. How often do you have (A2 = "MALE": 5 or more/ALL OTHERS: 4 or more) drinks on one occasion?**

- Daily or almost daily



- Weekly
- Monthly
- Less than monthly
- Never

**CKPT.F3a.**

1. F3 = "NEVER," GO TO F4
2. ALL OTHERS GO TO F3a

**F3a. How often do you have 6 or more drinks on one occasion?**

- Daily or almost daily
- Weekly
- Monthly
- Less than monthly
- Never

**F4. How often in the past 12 months have you...**

|                                                                                              | Daily or almost daily | Weekly                | Monthly               | Less than monthly     | Never                 |
|----------------------------------------------------------------------------------------------|-----------------------|-----------------------|-----------------------|-----------------------|-----------------------|
| a. found that you were not able to stop drinking once you had started?                       | <input type="radio"/> | <input type="radio"/> | <input type="radio"/> | <input type="radio"/> | <input type="radio"/> |
| b. failed to do what was normally expected of you because of drinking?                       | <input type="radio"/> | <input type="radio"/> | <input type="radio"/> | <input type="radio"/> | <input type="radio"/> |
| c. needed a first drink in the morning to get yourself going after a heavy drinking session? | <input type="radio"/> | <input type="radio"/> | <input type="radio"/> | <input type="radio"/> | <input type="radio"/> |
| d. had a feeling of guilt or remorse after drinking?                                         | <input type="radio"/> | <input type="radio"/> | <input type="radio"/> | <input type="radio"/> | <input type="radio"/> |
| e. been unable to remember what happened the night before because of your drinking?          | <input type="radio"/> | <input type="radio"/> | <input type="radio"/> | <input type="radio"/> | <input type="radio"/> |

**F5. Have you or someone else been injured because of your drinking?**

- Yes, in the past 12 months
- Yes, but not in the past 12 months
- No

**F6. Has a relative, friend, doctor, or other health care worker been concerned about your drinking or suggested you cut down?**

- Yes, in the past 12 months
- Yes, but not in the past 12 months
- No

**CKPT.F7.**

1. F3= AT LEAST "LESS THAN MONTHLY," GO TO F7
2. ONE OR MORE RESPONSES IN F4a-e SERIES = AT LEAST "LESS THAN MONTHLY," GO TO F7

3. F5 OR F6 = "YES, IN THE PAST 12 MONTHS" OR "YES, BUT NOT IN THE PAST 12 MONTHS," GO TO F7
4. ALL OTHERS GO TO F10.1

**F7.** [(F3 = AT LEAST "LESS THAN MONTHLY") AND (ALL RESPONSES IN F4a-e SERIES = "NEVER" OR MISSING) AND (F5 = "NO" OR MISSING) AND (F6 = "NO" OR MISSING) AND (A2 = "MALE"): You reported having 5 or more drinks on at least one occasion in your life./(F3 = AT LEAST "LESS THAN MONTHLY") AND (ALL RESPONSES IN F4a-e SERIES = "NEVER" OR MISSING) AND (F5 = "NO" OR MISSING) AND (F6 = "NO" OR MISSING) AND (A2 ≠ "MALE"): You reported having 4 or more drinks on at least one occasion in your life./(F3 = "NEVER" OR MISSING) AND (F4a = AT LEAST "LESS THAN MONTHLY") AND (F4b AND F4c AND F4d AND F4e = "NEVER" OR MISSING) AND (F5 = "NO" OR MISSING) AND (F6 = "NO" OR MISSING): You reported that you were not able to stop drinking once you had started./(F3 = "NEVER" OR MISSING) AND (F4b = AT LEAST "LESS THAN MONTHLY") AND (F4a AND F4c AND F4d AND F4e = "NEVER" OR MISSING) AND (F5 = "NO" OR MISSING) AND (F6 = "NO" OR MISSING): You reported that you failed to do what was expected of you because of drinking./(F3 = "NEVER" OR MISSING) AND (F4c = AT LEAST "LESS THAN MONTHLY") AND (F4a AND F4b AND F4d AND F4e = "NEVER" OR MISSING) AND (F5 = "NO" OR MISSING) AND (F6 = "NO" OR MISSING): You reported that you needed a drink in the morning to get yourself going./(F3 = "NEVER" OR MISSING) AND (F4d = AT LEAST "LESS THAN MONTHLY") AND (F4a AND F4b AND F4c AND F4e = "NEVER" OR MISSING) AND (F5 = "NO" OR MISSING) AND (F6 = "NO" OR MISSING): You reported that you felt guilt or remorse after drinking./(F3 = "NEVER" OR MISSING) AND (F4e = AT LEAST "LESS THAN MONTHLY") AND (F4a AND F4b AND F4c AND F4d = "NEVER" OR MISSING) AND (F5 = "NO" OR MISSING) AND (F6 = "NO" OR MISSING): You reported that you were unable to remember what happened the night before because of drinking./(F3 = "NEVER" OR MISSING) AND (ALL RESPONSES IN F4a-e SERIES = "NEVER" OR MISSING) AND (F5 = "YES, IN THE PAST 12 MONTHS" OR "YES, BUT NOT IN THE PAST 12 MONTHS") AND (F6 = "NO" OR MISSING): You reported that you or someone else has been injured because of your drinking./(F3 = "NEVER" OR MISSING) AND (ALL RESPONSES IN F4a-e SERIES = "NEVER" OR MISSING) AND (F5 = "NO" OR MISSING) AND (F6 = "YES, IN THE PAST 12 MONTHS" OR "YES, BUT NOT IN THE PAST 12 MONTHS"): You reported that others have been concerned about your drinking./ALL OTHERS: You reported several experiences associated with drinking alcohol (related to frequency of drinks, quantity of drinks, and/or behaviours that were concerning to you or others).] About how old were you the very first time you had [(TWO OR MORE RESPONSES IN F3, F4a-e SERIES = AT LEAST "LESS THAN MONTHLY") OR (ONE RESPONSE IN F3, F4a-e SERIES = AT LEAST "LESS THAN MONTHLY" AND F5 OR F6 = "YES, IN THE PAST 12 MONTHS" OR "YES, BUT NOT IN THE PAST 12 MONTHS") OR (F5 AND F6 = "YES, IN THE PAST 12 MONTHS" OR "YES, BUT NOT IN THE PAST 12 MONTHS"): any of these experiences/ALL OTHERS: this experience]?

[DROPDOWN LIST] 4 or younger, 5, ..., 35, 36 or older

**F8.** About how many different years in your life did you have [(TWO OR MORE RESPONSES IN F3, F4a-e SERIES = AT LEAST "LESS THAN MONTHLY") OR (ONE RESPONSE IN F3, F4a-e SERIES = AT LEAST "LESS THAN MONTHLY" AND F5 OR F6 = "YES, IN THE PAST 12 MONTHS" OR "YES, BUT NOT IN THE PAST 12 MONTHS") OR (F5 AND F6 = "YES, IN THE PAST 12 MONTHS" OR "YES, BUT NOT IN THE PAST 12 MONTHS"): any of these experiences/ALL OTHERS: this experience] associated with drinking alcohol? (*If less than 1 full year, choose "1."*)

[DROPDOWN LIST] 1, 2, ..., 35, 36 or more

**F9.** About how many months in the past 12 did you have [(TWO OR MORE RESPONSES IN F3, F4a-e SERIES = AT LEAST "LESS THAN MONTHLY") OR (ONE RESPONSE IN F3, F4a-e SERIES = AT LEAST "LESS THAN MONTHLY" AND F5 OR F6 = "YES, IN THE PAST 12 MONTHS" OR "YES, BUT NOT IN THE PAST 12 MONTHS") OR (F5 AND F6 = "YES, IN THE PAST 12 MONTHS" OR "YES, BUT NOT IN THE PAST 12 MONTHS"): any of these experiences/ALL OTHERS: this experience] associated with drinking alcohol?

[DROPDOWN LIST] 0, 1, ..., 11, 12

**F9a.** Did you have [(TWO OR MORE RESPONSES IN F3, F4a-e SERIES = AT LEAST "LESS THAN MONTHLY") OR (ONE RESPONSE IN F3, F4a-e SERIES = AT LEAST "LESS THAN MONTHLY" AND F5 OR F6 = "YES, IN THE PAST 12 MONTHS" OR "YES, BUT NOT IN THE PAST 12 MONTHS") OR (F5

**AND F6 = "YES, IN THE PAST 12 MONTHS" OR "YES, BUT NOT IN THE PAST 12 MONTHS"): any of these experiences/ALL OTHERS: this experience] associated with drinking alcohol at any time in the past 30 days?**

- Yes
- No

**F10.1. The following questions ask about your experience with various drugs**

**Think of the times in your life when you took each of the following medications most often for medical reasons, with a doctor's prescription and taken as prescribed. During those times, how often did you take each medication?**

|                                                                                                                                                                                                                                                                            | Every or nearly every day | 3-4 days a week       | 1-2 days a week       | 1-3 days a month      | Less than once a month | Never                 |
|----------------------------------------------------------------------------------------------------------------------------------------------------------------------------------------------------------------------------------------------------------------------------|---------------------------|-----------------------|-----------------------|-----------------------|------------------------|-----------------------|
| a. Cannabis <b>with</b> a doctor's prescription and <b>taken as prescribed</b>                                                                                                                                                                                             | <input type="radio"/>     | <input type="radio"/> | <input type="radio"/> | <input type="radio"/> | <input type="radio"/>  | <input type="radio"/> |
| b. Any prescription stimulant (e.g., amphetamine, methylphenidate, modafinil) <b>with</b> a doctor's prescription and <b>taken as prescribed</b>                                                                                                                           | <input type="radio"/>     | <input type="radio"/> | <input type="radio"/> | <input type="radio"/> | <input type="radio"/>  | <input type="radio"/> |
| c. Any pharmaceutical opioid (e.g., oxycodone, morphine, hydromorphone, meperidine, fentanyl patches, codeine or codeine-containing products such as Tylenol #1, #2, or #3) <b>with</b> a doctor's prescription and <b>taken as prescribed</b>                             | <input type="radio"/>     | <input type="radio"/> | <input type="radio"/> | <input type="radio"/> | <input type="radio"/>  | <input type="radio"/> |
| d. Any other prescription drug, such as anxiolytics, benzodiazepines [e.g., lorazepam (Ativan), alprazolam (Xanax), diazepam (Valium), clonazepam], or muscle relaxants (e.g., methocarbamol, baclofen) <b>with</b> a doctor's prescription and <b>taken as prescribed</b> | <input type="radio"/>     | <input type="radio"/> | <input type="radio"/> | <input type="radio"/> | <input type="radio"/>  | <input type="radio"/> |

**F10. Now think of the times in your life when you used each of the following substances most often without a doctor's prescription or in larger doses than prescribed. During those times, how often did you use each substance?**

|                                                                                                                                                                                                          | Every or nearly every day | 3-4 days a week       | 1-2 days a week       | 1-3 days a month      | Less than once a month | Never                 |
|----------------------------------------------------------------------------------------------------------------------------------------------------------------------------------------------------------|---------------------------|-----------------------|-----------------------|-----------------------|------------------------|-----------------------|
| a. Any prescription stimulant (e.g., amphetamine, methylphenidate, modafinil) either <b>without</b> a doctor's prescription or in <b>larger doses than prescribed</b> to get high, buzzed, or numbed out | <input type="radio"/>     | <input type="radio"/> | <input type="radio"/> | <input type="radio"/> | <input type="radio"/>  | <input type="radio"/> |

|    |                                                                                                                                                                                                                                                                                                                                 |                       |                       |                       |                       |                       |                       |
|----|---------------------------------------------------------------------------------------------------------------------------------------------------------------------------------------------------------------------------------------------------------------------------------------------------------------------------------|-----------------------|-----------------------|-----------------------|-----------------------|-----------------------|-----------------------|
| b. | Any pharmaceutical opioid (e.g., oxycodone, morphine, hydromorphone, meperidine, fentanyl patches, codeine or codeine-containing products such as Tylenol #1, #2, or #3) either <b>without</b> a doctor's prescription or in <b>larger doses than prescribed</b> to get high, buzzed, or numbed out                             | <input type="radio"/> | <input type="radio"/> | <input type="radio"/> | <input type="radio"/> | <input type="radio"/> | <input type="radio"/> |
| c. | Any other prescription drug, such as anxiolytics, benzodiazepines [e.g., lorazepam (Ativan), alprazolam (Xanax), diazepam (valium), clonazepam], or muscle relaxants (e.g., methocarbamol, baclofen) either <b>without</b> a doctor's prescription or in <b>larger doses than prescribed</b> to get high, buzzed, or numbed out | <input type="radio"/> | <input type="radio"/> | <input type="radio"/> | <input type="radio"/> | <input type="radio"/> | <input type="radio"/> |
| d. | Cannabis (e.g., marijuana, pot, grass, hash) for non-medical reasons                                                                                                                                                                                                                                                            | <input type="radio"/> | <input type="radio"/> | <input type="radio"/> | <input type="radio"/> | <input type="radio"/> | <input type="radio"/> |
| e. | Any street stimulant (e.g., cocaine, crack, meth, crystal meth) or any other stimulant obtained "on the street"                                                                                                                                                                                                                 | <input type="radio"/> | <input type="radio"/> | <input type="radio"/> | <input type="radio"/> | <input type="radio"/> | <input type="radio"/> |
| f. | Any street opioid (e.g., heroin, fentanyl) or any other opioid obtained "on the street"                                                                                                                                                                                                                                         | <input type="radio"/> | <input type="radio"/> | <input type="radio"/> | <input type="radio"/> | <input type="radio"/> | <input type="radio"/> |
| g. | Any other street drugs (e.g., LSD, ecstasy, PCP, mushrooms)                                                                                                                                                                                                                                                                     | <input type="radio"/> | <input type="radio"/> | <input type="radio"/> | <input type="radio"/> | <input type="radio"/> | <input type="radio"/> |

**CKPT.F11.**

- ONE OR MORE RESPONSES IN F10a-g SERIES = AT LEAST "LESS THAN ONCE A MONTH," GO TO F11
- ALL OTHERS GO TO CKPT.F18

**F11. Think of the 1 year in your life when your drug use (street drugs, drugs used without a doctor's prescription, or in larger doses than prescribed) interfered most with your life. During that year, how often did you have each of the following experiences?**

|    | Every or nearly every day                                                                                               | 3-4 days a week       | 1-2 days a week       | 1-3 days a month      | Less than once a month | Never                 |
|----|-------------------------------------------------------------------------------------------------------------------------|-----------------------|-----------------------|-----------------------|------------------------|-----------------------|
| a. | How often did your drug use or being under the influence interfere with your responsibilities at home, work, or school? | <input type="radio"/> | <input type="radio"/> | <input type="radio"/> | <input type="radio"/>  | <input type="radio"/> |
| b. | How often did you continue to use even when it caused arguments or other serious problems with your family or friends?  | <input type="radio"/> | <input type="radio"/> | <input type="radio"/> | <input type="radio"/>  | <input type="radio"/> |
| c. | How often were you under the influence in situations where you could get hurt?                                          | <input type="radio"/> | <input type="radio"/> | <input type="radio"/> | <input type="radio"/>  | <input type="radio"/> |
| d. | How often did you greatly reduce important activities with family, friends, or at work because of your drug use?        | <input type="radio"/> | <input type="radio"/> | <input type="radio"/> | <input type="radio"/>  | <input type="radio"/> |

- e. How often did you either use more or spend more time using than you intended when you started?

**F12. During that year, how often did you have each of these other experiences?**

|                                                                                                                                                                                                                               | Every or nearly every day | 3-4 days a week       | 1-2 days a week       | 1-3 days a month      | Less than once a month | Never                 |
|-------------------------------------------------------------------------------------------------------------------------------------------------------------------------------------------------------------------------------|---------------------------|-----------------------|-----------------------|-----------------------|------------------------|-----------------------|
| a. How often did you spend a great deal of time obtaining, using, or recovering from drug use?                                                                                                                                | <input type="radio"/>     | <input type="radio"/> | <input type="radio"/> | <input type="radio"/> | <input type="radio"/>  | <input type="radio"/> |
| b. How often did you have a strong desire or craving to use?                                                                                                                                                                  | <input type="radio"/>     | <input type="radio"/> | <input type="radio"/> | <input type="radio"/> | <input type="radio"/>  | <input type="radio"/> |
| c. How often did you feel the need to cut down or stop your drug use?                                                                                                                                                         | <input type="radio"/>     | <input type="radio"/> | <input type="radio"/> | <input type="radio"/> | <input type="radio"/>  | <input type="radio"/> |
| d. How often did you continue to use even when it either caused or worsened a physical or emotional health problem?                                                                                                           | <input type="radio"/>     | <input type="radio"/> | <input type="radio"/> | <input type="radio"/> | <input type="radio"/>  | <input type="radio"/> |
| e. You developed tolerance; that is, either the same amount no longer had the same effect or you needed to use a lot more to get the same effect?                                                                             | <input type="radio"/>     | <input type="radio"/> | <input type="radio"/> | <input type="radio"/> | <input type="radio"/>  | <input type="radio"/> |
| f. You experienced withdrawal symptoms like trouble sleeping, emotional problems, restlessness, sweating, or nausea when you tried to cut down your use or you continued to use in order to avoid having withdrawal symptoms? | <input type="radio"/>     | <input type="radio"/> | <input type="radio"/> | <input type="radio"/> | <input type="radio"/>  | <input type="radio"/> |

**CKPT.F13.**

1. TWO OR MORE RESPONSES IN F11a-e SERIES, F12a-f SERIES = AT LEAST "LESS THAN ONCE A MONTH," GO TO F13
2. ALL OTHERS GO TO CKPT.F18

**F13. You reported several experiences associated with using street drugs, drugs without a doctor's prescription, or in larger doses than prescribed. About how old were you the very first time you had any of these experiences?**

[DROPDOWN LIST] 4 or younger, 5, ..., 35, 36 or older

**F14. About how many different years in your life did you have any of these experiences?**

[DROPDOWN LIST] 1, 2, ..., 35, 36 or more

**F15. About how many months in the past 12 did you have any of these experiences?**

[DROPDOWN LIST] 0, 1, ..., 11, 12

**CKPT.F15a.**

1. F15 = 1-11, GO TO F15a
2. ALL OTHERS GO TO CKPT.F18

**F15a. Did you have any of these experiences in the past 30 days?**

- Yes
- No

**CKPT.F18.**

1. (TWO OR MORE RESPONSES IN F10a-g SERIES = AT LEAST "LESS THAN ONCE A MONTH") AND (TWO OR MORE RESPONSES IN F11a-e SERIES, F12a-f SERIES = AT LEAST "LESS THAN ONCE A MONTH"), GO TO F18
2. F10.1a OR F10d = AT LEAST "LESS THAN ONCE A MONTH," GO TO F19
3. ONE OR MORE RESPONSES IN F10.1a-d AND/OR F10a-g SERIES = AT LEAST "LESS THAN ONCE A MONTH," GO TO F22
4. F1 = AT LEAST "MONTHLY OR LESS" OR F2 = 1 OR MORE, GO TO F22
5. ALL OTHERS GO TO NEXT SECTION

**F18. Earlier you mentioned that you have used more than one drug. Which drug or drugs caused most of the experiences you described above? (Check all that apply.)**

- Cannabis for non-medical reasons
- Stimulants (including prescription medications taken without a doctor's prescription and street drugs)
- Opioids (including prescription medications taken without a doctor's prescription and street drugs)
- Any other prescription drug taken without a doctor's prescription
- Any other street drugs

**CKPT.F19.**

1. F10.1a OR F10d = AT LEAST "LESS THAN ONCE A MONTH," GO TO F19
2. ALL OTHERS GO TO F22

**F19. You mentioned that you use or used cannabis. Are you aware of the existence of two main components of cannabis, namely tetrahydrocannabinol (THC) and cannabidiol (CBD), and of their different properties?**

- Yes, I'm aware of their existence and of their different properties
- Yes, I'm aware of their existence but not of their different properties
- No, I'm not aware of their existence

**CKPT.F20.**

1. F19 ≠ "NO, I'M NOT AWARE OF THEIR EXISTENCE," GO TO F20
2. ALL OTHERS GO TO F21

**F20. If able to choose, do you choose higher tetrahydrocannabinol (THC) or higher cannabidiol (CBD) content?**

- Higher THC
- Higher CBD
- I don't care or don't know for sure

**F21. Which of the following statements is true about your use of cannabis? (Check all that apply.)**

- I use/have used synthetic cannabis (spice, K2, etc.)
- I mostly smoke cannabis (i.e., a joint)

- I mostly smoke cannabis in combination with tobacco
- When I smoke cannabis, I inhale deeply and/or hold my breath to increase the effect
- I mostly vape cannabis flowers and/or leaves, or take edibles
- I mostly vape cannabis extracts, concentrates, oils, or other processed forms of cannabis
- I use only once a week, on weekends, or less

**F22. With respect to driving or operating any machinery...**

- I absolutely never drive or operate machinery after drinking alcohol, taking or using any of the medications or drugs listed previously (or I do not ever drive or operate machinery)
- I only rarely drive or operate heavy machinery after drinking alcohol, taking or using any of the medications or drugs listed previously
- I sometimes drive or operate heavy machinery after drinking alcohol, taking or using any of the medications or drugs listed previously

**CKPT.F23.**

1. A2 = "FEMALE" AND F1 = AT LEAST "MONTHLY OR LESS" OR F2 = 1 OR MORE, GO TO F23
2. A2 = "FEMALE" AND ONE OR MORE RESPONSES IN F10a-g SERIES = AT LEAST "LESS THAN ONCE A MONTH," GO TO F23
3. ALL OTHERS GO TO CKPT.F24

**F23. Have you used alcohol or drugs while pregnant or breastfeeding? For this question, only consider street drugs or other drugs used without a doctor's prescription or in larger doses than prescribed.**

- I absolutely never use/used alcohol or drugs while pregnant or breastfeeding
- I sometimes use/used alcohol or drugs while pregnant or breastfeeding
- I only rarely use/used alcohol or drugs while pregnant or breastfeeding
- I've never been pregnant or breastfeeding

**CKPT.F24.**

1. F10.1c OR F10b OR F10f = AT LEAST "LESS THAN ONCE A MONTH," GO TO F24
2. ALL OTHERS GO TO NEXT SECTION

**F24. You mentioned that you use or used opioids. In which circumstance did you first use opioids?**

- They were prescribed to me for cancer-related pain
  - They were prescribed to me for non-cancer pain (e.g., a sports lesion, back pain, etc.)
  - They were prescribed to a family member, roommate or close acquaintance who shared them with me, or from whom I took some
  - I was offered them by someone who used them to get high, relax, party, or other non-medically indicated reason
  - I bought them on the street or took them from someone without their knowledge
  - Other (*Please briefly describe*)
- 

**CKPT.F25.**

1. F24= "THEY WERE PRESCRIBED TO ME FOR NON-CANCER PAIN," GO TO F25
2. ALL OTHERS GO TO NEXT SECTION

**F25. What kind of non-cancer pain did/do you have?**

- Of the muscles, joints, or soft tissue, such as resulting from sports or work injuries, fibromyalgia, chronic back or neck pain, etc.
- Neuropathic, such as due to diabetes, nerve injury, or infections
- Visceral pain, such as due to lesions or disease of internal organs
- Post-surgical pain
- Other

**F26. When you first consulted for such pain, did you receive non-opioid medication (such as acetaminophen or non-steroidal anti-inflammatories including ibuprofen, diclofenac, celecoxib, etc., or antidepressants) and/or non-pharmacologic interventions (such as exercise, mindfulness, yoga, Tai-Chi, massage or manipulation, or acupuncture)?**

- Yes, I received **optimal trials** of non-opioid medication plus non-pharmacologic interventions (i.e., adequately monitored interventions lasting one month or longer) **before** resorting to opioids
- Yes, I **briefly** tried non-opioids and non-pharmacologic interventions (i.e., for days to weeks), but **quickly** concluded they wouldn't work for me
- No, I was prescribed opioids directly

**F27. When you first started opioid therapy, do you recall the first drug you used and in which daily dose?**

- Morphine, 50mg or less
- Morphine, more than 50mg
- Morphine, don't remember the dose
- Codeine, 300mg or less
- Codeine, more than 300mg
- Codeine, don't remember the dose
- Oxycodone, 30mg or less
- Oxycodone, more than 30mg
- Oxycodone, don't remember the dose
- Hydromorphone, 10mg or less
- Hydromorphone, more than 10mg
- Hydromorphone, don't remember the dose
- Tramadol, 300mg or less
- Tramadol, more than 300mg
- Tramadol, don't remember the dose
- Fentanyl patch, 25mcg/h or less
- Fentanyl patch, more than 25mcg/h
- Fentanyl, don't remember the dose
- Other, don't remember

**F28. During the course of your treatment with opioids, did your doctor maintain the initial drug and dose, switch to a different opioid, or significantly increase the dose?**

- My doctor maintained the initial dose and achieved pain control with it
- My doctor maintained the initial dose despite not achieving pain control with it
- My doctor switched me to one or more different opioids because of persistent pain
- My doctor significantly increased my dose because of persistent pain
- Don't know



**F29. Did your doctor attempt to taper down (i.e., gradually decrease) or discontinue your opioid treatment?**

- Yes, we successfully tapered down and discontinued the opioid. I never used opioids again.
- Yes, we successfully tapered down and discontinued the opioid. I had to start again later because of recurring pain.
- Yes, we successfully tapered down to the lowest effective dose, which I'm still taking.
- Yes, we tried to taper down the dose but were not able due to recurring pain or abstinence, so I'm still taking it.
- Yes, we tried to taper down the dose but were not able due to recurring pain or abstinence, so I was referred to a specialized multidisciplinary program.
- No, my doctor didn't try to taper down, I'm still taking the same dose
- No, my doctor didn't try to taper down. I eventually stopped using on my own

**F30. Is your pain under control now?**

- Yes, completely
- Yes, partially
- Not at all

**F31. Are you using opioids now?**

- Yes, street opioids
- Yes, pharmaceutical opioids, as prescribed
- Yes, pharmaceutical opioids, without prescription or in larger amounts than prescribed
- No

**END OF SECTION**

## SECTION G: SELF-HARM

The following sections include questions about sensitive topics, such as self-harm and traumatic experiences. Your responses are completely anonymous, and will improve our understanding of the mental health needs of students. If these questions are stressful or you prefer not to answer, you may skip them.

**G1. Did you ever in your life wish you were dead or would go to sleep and never wake up?**

- Yes
- No

**G2. Did you ever in your life have thoughts of killing yourself?**

- Yes
- No

**CKPT.G3.**

1. G1 OR G2 = "YES," GO TO G3
2. ALL OTHERS GO TO G16

**G3. About how old were you the very first time you (G1 = "YES" AND G2 = "NO" OR MISSING: wished you were dead or would go to sleep and never wake up/G1 = "NO" OR MISSING AND G2 = "YES": had thoughts of killing yourself/ALL OTHERS: either wished you were dead, wished you would go to sleep and never wake up, or had thoughts of killing yourself)?**

[DROPDOWN LIST] 4 or younger, 5, ..., 35, 36 or older

**G4. About how many different years in your life did you (G1 = "YES" AND G2 = "NO" OR MISSING: wish you were dead or would go to sleep and never wake up/G1 = "NO" OR MISSING AND G2 = "YES": have thoughts of killing yourself/ALL OTHERS: either wish you were dead, wish you would go to sleep and never wake up, or have thoughts of killing yourself)? (If less than 1 full year, choose "1.")**

[DROPDOWN LIST] 1, 2, ..., 35, 36 or more

**G5. About how many months in the past 12 did you (G1 = "YES" AND G2 = "NO" OR MISSING: wish you were dead or would go to sleep and never wake up/G1 = "NO" OR MISSING AND G2 = "YES": have thoughts of killing yourself/ALL OTHERS: either wish you were dead, wish you would go to sleep and never wake up, or have thoughts of killing yourself)?**

[DROPDOWN LIST] 0, 1, ..., 11, 12

**CKPT.G6.**

1. G5 = 1-12, GO TO G6
2. ALL OTHERS GO TO G7

**G6. In the past 30 days, how often did you (G1 = "YES" AND G2 = "NO" OR MISSING: wish you were dead or would go to sleep and never wake up/G1 = "NO" OR MISSING AND G2 = "YES": have thoughts of killing yourself/ALL OTHERS: either wish you were dead, wish you would go to sleep and never wake up, or have thoughts of killing yourself)?**

- All or almost all of the time
- Most of the time

- Some of the time
- A little of the time
- None of the time

**G7. Did you ever think about how you might kill yourself (e.g., taking pills, shooting yourself) or work out a plan of how to kill yourself?**

- Yes
- No

**CKPT.G8.**

1. G7 = "NO" OR MISSING, GO TO G12
2. ALL OTHERS GO TO G8

**G8. About how old were you the very first time you thought about how you might kill yourself or worked out a plan of how to kill yourself?**

[DROPDOWN LIST] 4 or younger, 5, ..., 35, 36 or older

**G9. About how many different years in your life did you think about how you might kill yourself or work out a plan of how to kill yourself? (If less than 1 full year, choose "1.")**

[DROPDOWN LIST] 1, 2, ..., 35, 36 or more

**G10. About how many months in the past 12 did you think about how you might kill yourself or work out a plan of how to kill yourself?**

[DROPDOWN LIST] 0, 1, ..., 11, 12

**G11. How likely do you think it is that you will act on this plan in the next 12 months?**

- Very likely
- Somewhat likely
- Not very likely
- Not at all likely

**G12. Think of the one week in your life when you thought most about (G1 = "YES" AND G2 = "NO" OR MISSING: wanting to be dead/G1 = "NO" OR MISSING AND G2 = "YES": killing yourself/ALL OTHERS: wanting to be dead or about killing yourself). How many days during that worst week did you have those thoughts?**

[DROPDOWN LIST] 1, ..., 6, 7

**G13. (G12 ≥ 2 AND ≠ MISSING: How long during that worst week did those thoughts usually last on the days that you had them?/ALL OTHERS: How long during that worst week did those thoughts last on the day that you had them?)**

- Just a few seconds or minutes
- Less than 1 hour
- 1-4 hours
- 5-8 hours
- 9 or more hours

**G14. During that worst week, how easy was it for you to control those thoughts or push them out of your mind when you wanted to?**

- Easy
- A little difficult
- Somewhat difficult
- Very difficult
- Impossible; unable to control the thoughts

**CKPT.G15.**

1. G1 OR G2 = "YES," GO TO G15
2. ALL OTHERS GO TO G16

**G15. People who think about wanting to die sometimes do dangerous things as a way to tempt fate (e.g., take a lot of drugs, drive too fast, volunteer for dangerous missions, or act recklessly). How often in your life did you ever do dangerous things like that to tempt fate?**

- Very often
- Often
- Sometimes
- Rarely
- Never

**G16. Have you ever made a suicide attempt (i.e., purposefully hurt yourself with at least some intent to die)?**

- Yes
- No

**CKPT.G17.**

1. G16 = "NO" OR MISSING, GO TO G20
2. ALL OTHERS GO TO G17

**G17. About how old were you the very first time you made a suicide attempt?**

[DROPDOWN LIST] 4 or younger, 5, ..., 35, 36 or older

**G18. How many different suicide attempts have you ever made?**

\_\_\_\_\_ NUMBER OF SUICIDE ATTEMPTS IN LIFETIME

**G19. How many different suicide attempts have you made in the past 12 months?**

\_\_\_\_\_ NUMBER OF SUICIDE ATTEMPTS IN PAST YEAR

**G20. Did you ever do something to hurt yourself on purpose, without wanting to die (e.g., cutting yourself, hitting yourself, or burning yourself)?**

- Yes
- No

**CKPT.G21.**

1. G20 = "NO" OR MISSING, GO TO NEXT SECTION
2. ALL OTHERS GO TO G21

**G21. About how old were you the very first time you did something to hurt yourself on purpose, without wanting to die?**

[DROPDOWN LIST] 4 or younger, 5, ..., 35, 36 or older

**G22. About how many times in your life did you do something to hurt yourself on purpose, without wanting to die?**

[DROPDOWN LIST]

- 1-2 times
- 3-5 times
- 6-10 times
- 11-20 times
- 21-30 times
- 31-50 times
- 51-100 times
- 101 or more times

**G23. How many times in the past 12 months did you do something to hurt yourself on purpose, without wanting to die?**

[DROPDOWN LIST]

- 0 times
- 1-2 times
- 3-4 times
- 5-10 times
- 11-20 times
- 21-30 times
- 31-50 times
- 51-100 times
- 101 or more times

**END OF SECTION**

## SECTION H: SEEKING TREATMENT

**H1. Did you ever in your life receive psychological counselling or medication for an emotional or substance use problem?**

|                              | Yes                   | No                    |
|------------------------------|-----------------------|-----------------------|
| a. Psychological counselling | <input type="radio"/> | <input type="radio"/> |
| b. Medication                | <input type="radio"/> | <input type="radio"/> |

**CKPT.H2.**

1. H1a = "NO" OR MISSING AND H1b = "NO" OR MISSING, GO TO H6
2. ALL OTHERS GO TO H2

**H2. How old were you the very first time you received psychological counselling or medication for an emotional or substance use problem?**

[DROPDOWN LIST] 4 or younger, 5, ..., 35, 36 or older

**H3. About how many months in the past 12 did you receive psychological counselling or medication?**

[DROPDOWN LIST] 0, 1, ..., 11, 12

**CKPT.H4.**

1. H3 = 1-12, GO TO H5
2. ALL OTHERS GO TO H4

**H4. How old were you the most recent time you received psychological counselling or medication for an emotional or substance use problem?**

[DROPDOWN LIST] 4 or younger, 5, ..., 35, 36 or older

**H5. Are you still in treatment or have you stopped?**

- Still in treatment  
 Stopped

**CKPT.H6.**

1. H5 = "STILL IN TREATMENT," GO TO H9
2. ALL OTHERS GO TO H6

**H6. How would you rate your readiness or willingness to change any emotional or substance use problems you are experiencing at this time?**

- I do not have a problem that I need to change  
 I have a problem, but I am not yet sure I want to take action to change it  
 I have a problem and I intend to address it  
 I have a problem and I already am working actively to change it  
 I had a problem but I have addressed it and things are better now

**CKPT.H7.**

1. H3 = 1-12, GO TO H9
2. ALL OTHERS GO TO H7

**H7. Was there ever a time in the past 12 months when you felt that you might need psychological counselling or medication for any emotional or substance use problems?**

- Yes  
 No → GO TO H9

[PROGRAMMER: SKIP MISSING WITH "NO"]

**H8. How important were each of the following reasons for why you did NOT seek help for your problem(s)?**

|                                                                                           | Very important        | Important             | Moderately important  | Of little importance  | Unimportant           |
|-------------------------------------------------------------------------------------------|-----------------------|-----------------------|-----------------------|-----------------------|-----------------------|
| a. You were not sure if available treatments were very effective                          | <input type="radio"/> | <input type="radio"/> | <input type="radio"/> | <input type="radio"/> | <input type="radio"/> |
| b. You wanted to handle the problem on your own                                           | <input type="radio"/> | <input type="radio"/> | <input type="radio"/> | <input type="radio"/> | <input type="radio"/> |
| c. You were too embarrassed                                                               | <input type="radio"/> | <input type="radio"/> | <input type="radio"/> | <input type="radio"/> | <input type="radio"/> |
| d. You talked to friends or relatives instead                                             | <input type="radio"/> | <input type="radio"/> | <input type="radio"/> | <input type="radio"/> | <input type="radio"/> |
| e. It costs too much money                                                                | <input type="radio"/> | <input type="radio"/> | <input type="radio"/> | <input type="radio"/> | <input type="radio"/> |
| f. You were unsure of where to go or who to see                                           | <input type="radio"/> | <input type="radio"/> | <input type="radio"/> | <input type="radio"/> | <input type="radio"/> |
| g. You had problems with time, transportation, or scheduling                              | <input type="radio"/> | <input type="radio"/> | <input type="radio"/> | <input type="radio"/> | <input type="radio"/> |
| h. You were afraid it might harm your school or professional career                       | <input type="radio"/> | <input type="radio"/> | <input type="radio"/> | <input type="radio"/> | <input type="radio"/> |
| i. You worried that people would treat you differently if they knew you were in treatment | <input type="radio"/> | <input type="radio"/> | <input type="radio"/> | <input type="radio"/> | <input type="radio"/> |
| j. Some other reason ( <i>Briefly describe in the text box below</i> )                    | <input type="radio"/> | <input type="radio"/> | <input type="radio"/> | <input type="radio"/> | <input type="radio"/> |

**H9. In the past, have you ever looked for information, help, or treatment for any emotional or substance use problem on the internet, through apps or online tools?**

- Yes  
 No

**H10. Now or in the future, if you wanted to receive support managing stress and responsibilities, help dealing with emotional or substance use issues, or psychotherapy, how likely would you be to try an e-mental health resource, such as an app or an online tool?**

- Very likely  
 Somewhat likely

- Not very likely
- Not at all likely

**END OF SECTION**



## SECTION I: CHILDHOOD BACKGROUND

### I1. Is your mother still alive or is she deceased?

- Alive
- Deceased

#### CKPT.I1a.

1. I1 = "ALIVE" OR MISSING, GO TO I1c
2. ALL OTHERS GO TO I1b

### I1b. How much education did she have?

- None
- Elementary school
- Secondary school
- Some post-secondary education
- University graduate
- Doctoral degree
- Don't know

#### GO TO I2

### I1c. How much education does she have?

- None
- Elementary school
- Secondary school
- Some post-secondary education
- University graduate
- Doctoral degree
- Don't know

### I2. Is your father still alive or is he deceased?

- Alive
- Deceased

#### CKPT.I2a.

1. I2 = "ALIVE" OR MISSING, GO TO I2c
2. ALL OTHERS GO TO I2b

### I2b. How much education did he have?

- None
- Elementary school
- Secondary school
- Some post-secondary education
- University graduate

- Doctoral degree
- Don't know

**GO TO CKPT.I3a**

**I2c. How much education does he have?**

- None
- Elementary school
- Secondary school
- Some post-secondary education
- University graduate
- Doctoral degree
- Don't know

**CKPT.I3a.**

1. I1 = "DECEASED" AND I2 = "ALIVE" OR MISSING, GO TO I3a
2. I1 = "ALIVE" OR MISSING AND I2 = "DECEASED," GO TO I3b
3. I1 = "DECEASED" AND I2 = "DECEASED," GO TO I3c
4. I1 = "ALIVE" OR MISSING AND I2 = "ALIVE" OR MISSING, GO TO I3d

**I3a. At the time your mother died, were your parents married to each other, separated, or divorced?**

- Married
- Separated
- Divorced
- They were never married

**GO TO I4**

**I3b. At the time your father died, were your parents married to each other, separated, or divorced?**

- Married
- Separated
- Divorced
- They were never married

**GO TO I4**

**I3c. At the time the first of your parents died, were they married to each other, separated, or divorced?**

- Married
- Separated
- Divorced
- They were never married

**GO TO I4**

**I3d. Are your parents married to each other, separated, or divorced?**

- Married

- Separated
- Divorced
- They were never married

**14. How much of the time did you have each of the following experiences up through age 17?**

|                                                                                                        | Very often            | Often                 | Sometimes             | Rarely                | Never                 |
|--------------------------------------------------------------------------------------------------------|-----------------------|-----------------------|-----------------------|-----------------------|-----------------------|
| a. One of your parents (or the people who raised you) had a serious emotional or mental health problem | <input type="radio"/> | <input type="radio"/> | <input type="radio"/> | <input type="radio"/> | <input type="radio"/> |
| b. One of your parents (or the people who raised you) had a serious alcohol or drug problem            | <input type="radio"/> | <input type="radio"/> | <input type="radio"/> | <input type="radio"/> | <input type="radio"/> |
| c. One of your parents (or the people who raised you) attempted suicide or died by suicide             | <input type="radio"/> | <input type="radio"/> | <input type="radio"/> | <input type="radio"/> | <input type="radio"/> |
| d. One of your parents (or the people who raised you) was involved in criminal activities              | <input type="radio"/> | <input type="radio"/> | <input type="radio"/> | <input type="radio"/> | <input type="radio"/> |
| e. Your parents (or the people who raised you) hit each other or were violent to each other            | <input type="radio"/> | <input type="radio"/> | <input type="radio"/> | <input type="radio"/> | <input type="radio"/> |
| f. Someone in your family hit you so hard that it left bruises or marks                                | <input type="radio"/> | <input type="radio"/> | <input type="radio"/> | <input type="radio"/> | <input type="radio"/> |

**15. And how much of the time did you have each of these experiences up through age 17?**

|                                                                              | Very often            | Often                 | Sometimes             | Rarely                | Never                 |
|------------------------------------------------------------------------------|-----------------------|-----------------------|-----------------------|-----------------------|-----------------------|
| a. You were physically abused at home                                        | <input type="radio"/> | <input type="radio"/> | <input type="radio"/> | <input type="radio"/> | <input type="radio"/> |
| b. Someone in your family repeatedly said hurtful or insulting things to you | <input type="radio"/> | <input type="radio"/> | <input type="radio"/> | <input type="radio"/> | <input type="radio"/> |
| c. You were emotionally abused at home                                       | <input type="radio"/> | <input type="radio"/> | <input type="radio"/> | <input type="radio"/> | <input type="radio"/> |
| d. Someone in your family made you feel special or important                 | <input type="radio"/> | <input type="radio"/> | <input type="radio"/> | <input type="radio"/> | <input type="radio"/> |
| e. Someone in your family touched you or made you touch them in a sexual way | <input type="radio"/> | <input type="radio"/> | <input type="radio"/> | <input type="radio"/> | <input type="radio"/> |

**16. And how much of the time did you have each of these experiences up through age 17?**

|                                                                                                                                     | Very often            | Often                 | Sometimes             | Rarely                | Never                 |
|-------------------------------------------------------------------------------------------------------------------------------------|-----------------------|-----------------------|-----------------------|-----------------------|-----------------------|
| a. You were sexually abused at home                                                                                                 | <input type="radio"/> | <input type="radio"/> | <input type="radio"/> | <input type="radio"/> | <input type="radio"/> |
| b. You were seriously neglected at home (e.g., nobody took care of you or protected you or made sure you had the things you needed) | <input type="radio"/> | <input type="radio"/> | <input type="radio"/> | <input type="radio"/> | <input type="radio"/> |
| c. You had to do chores too hard or dangerous for someone your age                                                                  | <input type="radio"/> | <input type="radio"/> | <input type="radio"/> | <input type="radio"/> | <input type="radio"/> |
| d. You felt loved and cared for by your family/at home                                                                              | <input type="radio"/> | <input type="radio"/> | <input type="radio"/> | <input type="radio"/> | <input type="radio"/> |

- |    |                                                               |                       |                       |                       |                       |                       |
|----|---------------------------------------------------------------|-----------------------|-----------------------|-----------------------|-----------------------|-----------------------|
| e. | People in your family looked out for you and took care of you | <input type="radio"/> | <input type="radio"/> | <input type="radio"/> | <input type="radio"/> | <input type="radio"/> |
| f. | You felt emotionally close to your family members             | <input type="radio"/> | <input type="radio"/> | <input type="radio"/> | <input type="radio"/> | <input type="radio"/> |

**17. Were you physically or sexually abused outside your home or family up through age 17?**

- No
- Yes, physically
- Yes, sexually
- Yes, both

**END OF SECTION**

## SECTION J: RECENT EXPERIENCES

**J1. Did you have any of the following stressful experiences in the past 12 months?**

|                                                                                         | Yes                   | No                    |
|-----------------------------------------------------------------------------------------|-----------------------|-----------------------|
| a. A life-threatening illness or injury of a very close friend or family member         | <input type="radio"/> | <input type="radio"/> |
| b. The death of a close friend or family member                                         | <input type="radio"/> | <input type="radio"/> |
| c. A break-up with a romantic partner                                                   | <input type="radio"/> | <input type="radio"/> |
| d. You discovered that a romantic partner cheated on you                                | <input type="radio"/> | <input type="radio"/> |
| e. A serious betrayal by someone else close to you                                      | <input type="radio"/> | <input type="radio"/> |
| f. Serious ongoing arguments or break-ups with some other close friend or family member | <input type="radio"/> | <input type="radio"/> |

**J2. Did you have any of the following stressful experiences in the past 12 months?**

|                                                                                                        | Yes                   | No                    |
|--------------------------------------------------------------------------------------------------------|-----------------------|-----------------------|
| a. You were involved in a life-threatening accident                                                    | <input type="radio"/> | <input type="radio"/> |
| b. You were bullied                                                                                    | <input type="radio"/> | <input type="radio"/> |
| c. You were physically assaulted (e.g., mugged)                                                        | <input type="radio"/> | <input type="radio"/> |
| d. You were sexually assaulted or raped                                                                | <input type="radio"/> | <input type="radio"/> |
| e. You were sexually harassed (e.g., someone made inappropriate sexual remarks about you or your body) | <input type="radio"/> | <input type="radio"/> |
| f. You had trouble with the police                                                                     | <input type="radio"/> | <input type="radio"/> |
| g. You spent time in jail                                                                              | <input type="radio"/> | <input type="radio"/> |
| h. You had a serious legal problem                                                                     | <input type="radio"/> | <input type="radio"/> |
| i. Any other very stressful event ( <i>Briefly describe in the text box below</i> )                    | <input type="radio"/> | <input type="radio"/> |

**J3. How much stress do you currently have in each of the following areas of your life?**

|                                                         | Very severe           | Severe                | Moderate              | Mild                  | None                  |
|---------------------------------------------------------|-----------------------|-----------------------|-----------------------|-----------------------|-----------------------|
| a. Your financial situation                             | <input type="radio"/> | <input type="radio"/> | <input type="radio"/> | <input type="radio"/> | <input type="radio"/> |
| b. Your health                                          | <input type="radio"/> | <input type="radio"/> | <input type="radio"/> | <input type="radio"/> | <input type="radio"/> |
| c. Your academic performance                            | <input type="radio"/> | <input type="radio"/> | <input type="radio"/> | <input type="radio"/> | <input type="radio"/> |
| d. Your love life                                       | <input type="radio"/> | <input type="radio"/> | <input type="radio"/> | <input type="radio"/> | <input type="radio"/> |
| e. Your relationships with your family                  | <input type="radio"/> | <input type="radio"/> | <input type="radio"/> | <input type="radio"/> | <input type="radio"/> |
| f. Problems getting along with people at work or school | <input type="radio"/> | <input type="radio"/> | <input type="radio"/> | <input type="radio"/> | <input type="radio"/> |
| g. The health of your loved ones                        | <input type="radio"/> | <input type="radio"/> | <input type="radio"/> | <input type="radio"/> | <input type="radio"/> |
| h. Other problems experienced by your loved ones        | <input type="radio"/> | <input type="radio"/> | <input type="radio"/> | <input type="radio"/> | <input type="radio"/> |
| i. Your life overall                                    | <input type="radio"/> | <input type="radio"/> | <input type="radio"/> | <input type="radio"/> | <input type="radio"/> |

**J4. The next few questions are about your social life. How often do you talk on the phone, text, or chat online with friends or relatives?**

- Almost every day
- A few times a week
- A few times a month
- Once a month
- Less than once a month
- Never

**J5. How often do you get together in person with friends for social or recreational activities?**

- Almost every day
- A few times a week
- A few times a month
- Once a month
- Less than once a month
- Never

**CKPT.J6.**

1. J4 OR J5 = AT LEAST "ONCE A MONTH," GO TO J6
2. ALL OTHERS GO TO J7

**J6. About how many friends and relatives do you talk to on the phone, text, chat with online, or get together with at least once a month?**

\_\_\_\_\_ NUMBER OF FRIENDS AND RELATIVES

**J7. How often do you attend meetings of religious, fraternal, social, or recreational groups you belong to?**

- Almost every day
- A few times a week
- A few times a month
- Once a month
- Less than once a month
- Never

**J8. How much could you rely on people in your personal life for support and comfort if you had a serious personal problem?**

- A lot
- Some
- A little → GO TO J10
- Not at all → GO TO J10

[PROGRAMMER: SKIP MISSING WITH "A LOT"]

**J9. How many people could you rely on for support and comfort if you had a serious personal problem?**

\_\_\_\_\_ NUMBER OF PEOPLE

**J10. How many people in your personal life would you feel comfortable opening up to and confiding in without feeling embarrassed if you had a serious personal problem? (If none, enter "0".)**

\_\_\_\_\_ NUMBER OF PEOPLE

**J11. How often do the people in your personal life make too many demands on you?**

- Often
- Sometimes
- Rarely
- Never

**J12. How often do the people in your personal life argue with you or say things that make you feel bad about yourself?**

- Often
- Sometimes
- Rarely
- Never

**END OF SECTION**

## SECTION K: SEXUALITY

**K1. What is your sexual orientation?**

- Heterosexual or straight
  - Gay or lesbian
  - Bisexual
  - Asexual
  - Not sure
  - Other (*Briefly describe in the text box below*)
- 

**K2. Which of the following best describes your feelings of sexual attraction to women?**

- Very sexually attracted
- A good deal sexually attracted
- Somewhat sexually attracted
- A little sexually attracted
- Not at all sexually attracted

**K3. Which of the following best describes your feelings of sexual attraction to men?**

- Very sexually attracted
- A good deal sexually attracted
- Somewhat sexually attracted
- A little sexually attracted
- Not at all sexually attracted

**K4. In the past 5 years, who have you had sex with? (*We use the word "sex" to mean any kind of sexual contact, not just sexual intercourse, but also, for example, oral sex or masturbation.*)**

- Men only
- Women only
- Non-binary only
- More than one of the above
- I have not had sex

**K5. What is your marital status?**

- Married → GO TO CKPT.K7
- Separated
- Divorced
- Widowed
- Never married

[PROGRAMMER: SKIP MISSING WITH "NEVER MARRIED"]

**K6. Which of the following best describes your current relationship situation?**



- Living with someone in a marriage-like relationship or engaged to be married
- Steadily dating one person, but not engaged
- Dating multiple people in committed relationships
- Dating one or more people, but not in a steady relationship
- Not currently dating

**CKPT.K7.**

1. K4 ≠ "I HAVE NOT HAD SEX," GO TO K7
2. ALL OTHERS END SURVEY

**K7. Have you ever used Viagra (sildenafil), Cialis (tadalafil) or other similar drugs to improve your sexual function?**

- Yes, every time I have sex
- Yes, most of the times I have sex
- Yes, some of the times I have sex
- Yes, once or a few times
- Never

**END OF SURVEY**
